# Supplementary material for: Correlations between personality traits and specific groups of alpha waves in the human EEG
Source: PeerJ. 2016 Jul 19;4:e2245. doi: 10.7717/peerj.2245 (PMC4957988; doi:10.7717/peerj.2245)
Supplement: Data S2 [file peerj-04-2245-s002.xlsx]

## Sheet: Sheet1
	7.1	7.3	7.6	7.6	7.7	7.7	7.7	7.8	7.8	7.9	7.9	7.9	7.9	8.0	8.0	8.1	8.1	8.1	8.1	8.1	8.1	8.1	8.1	8.1	8.2	8.2	8.2	8.2	8.2	8.2	8.2	8.2	8.2	8.3	8.3	8.3	8.3	8.3	8.3	8.4	8.4	8.5	8.5	8.5	8.6	8.7	8.9	9.1	9.1
	i	p	i	i	i	w	p	p	p	p	p	p	p	p	w	p	p	w	w	p	p	i	i	w	p	i	w	i	w	i	p	w	i	i	w	w	i	p	w	p	w	p	p	w	p	p	p	w	i
	34	12	112	110	5	27	78	57	64	20	56	30	49	50	89	143	165	154	175	6	3	91	69	62	52	87	59	177	107	1	31	77	46	97	45	185	93	187	124	151	44	186	141	155	108	111	68	17	13
	081030	080318	110208a	110128a	080111	080723	090617	090312	090409a	080611a	090310	080901	090126a	090126b	100317	110810a	111027b	110912	120207c	080116	080104b	100511a	090430	090407b	090225	100304	090331a	120215	110110a	080103	080923	090518b	090114	101022a	081124	120802	100929	121128a	110315	110907a	081119	121121	110722b	110913a	110127a	110128b	090423	080508	080319
	32	56	26	28	63	48	32	50	30	55	57	55	37	18	54	43	26	38	45	50	59	34	23	56	30	28	51	39	36	47	23	47	36	23	52	38	66	22	29	42	59	57	58	48	46	28	54	25	61
	f	m	m	f	f	m	m	f	f	f	f	f	f	f	m	f	f	f	m	f	f	f	f	f	f	f	f	f	m	f	f	m	f	f	f	m	f	f	m	f	m	m	f	m	f	f	f	m	m
EXTRAVERSION	8	21	54	52	63	49	59	88	40	53	55	83	55	61	52	48	78	67	47	83	55	71	80	68	92	78	60	67	40	77	67	32	52	76	68	34	57	62	74	40	98	37	63	97	9	22	16	50	27
Friendliness	21	7	65	49	80	83	82	95	91	30	76	76	68	82	83	95	96	85	57	95	84	77	85	76	85	91	90	77	47	90	68	47	91	91	84	28	80	77	94	58	95	57	76	98	14	3	30	74	54
Gregariousness	11	11	72	75	69	81	72	91	67	60	77	91	59	65	88	33	94	75	64	99	95	89	75	91	94	97	84	89	64	95	94	73	89	75	69	21	91	75	80	60	99	73	77	99	10	25	24	29	48
Assertiveness	19	70	63	2	57	6	73	34	90	95	4	74	75	30	40	9	47	28	70	25	25	28	57	25	75	57	54	47	25	34	66	30	47	66	44	34	20	47	81	25	60	30	64	87	82	83	9	34	2
Activity Level	21	86	60	63	52	47	38	78	1	49	39	59	30	65	26	39	63	52	17	49	49	52	52	49	63	12	20	30	70	20	21	9	1	63	49	27	31	30	18	69	68	17	29	47	1	73	2	27	41
Excitement-Seeking	41	1	26	79	49	12	4	59	1	12	59	59	8	23	1	19	31	71	30	38	1	61	71	59	87	41	19	51	26	59	22	62	14	8	28	84	18	51	46	19	99	30	59	62	19	14	86	56	25
Cheerfulness	5	25	27	50	31	67	66	88	61	60	71	71	80	76	67	88	61	50	46	80	60	71	80	60	71	88	60	61	27	88	80	9	61	94	88	37	76	61	66	28	92	35	39	97	28	5	19	76	38
AGREEABLENESS	44	75	68	86	71	87	84	93	62	47	91	50	86	68	89	96	92	50	39	89	95	94	84	78	74	79	89	44	49	89	65	31	96	98	84	65	60	88	95	78	63	42	86	82	0	20	65	77	72
Trust	39	75	42	83	77	55	70	93	76	32	93	80	76	45	65	97	90	76	4	62	87	95	95	80	98	90	97	67	24	80	29	35	98	98	93	79	58	83	70	71	75	45	80	90	32	29	42	61	28
Morality	32	85	39	71	38	85	81	63	32	63	78	17	71	72	74	78	83	32	63	78	78	83	20	63	83	45	78	20	72	78	71	26	83	83	78	29	21	83	89	63	50	26	47	85	63	32	31	81	81
Altruism	38	66	95	38	47	54	22	77	38	34	64	3	79	28	54	88	66	14	30	64	64	89	79	21	66	38	88	52	45	77	38	41	66	79	21	33	78	14	80	49	54	41	49	10	1	52	77	57	40
Cooperation	64	82	72	82	64	64	93	83	89	83	83	83	82	83	90	83	89	64	53	62	83	73	73	83	44	82	49	44	54	62	82	22	64	89	83	63	76	89	93	73	90	53	83	90	62	24	62	93	86
Modesty	86	80	35	69	74	99	74	66	21	45	56	45	50	89	88	35	50	50	60	85	85	50	69	85	30	60	56	30	65	56	60	71	86	60	56	82	8	97	82	66	39	29	92	29	16	7	76	65	97
Sympathy	11	9	82	88	52	69	82	77	79	39	77	65	88	29	79	94	88	55	69	94	77	88	79	52	55	79	65	67	41	94	79	36	88	95	77	63	93	55	82	77	36	79	65	98	1	67	65	41	38
CONSCIENTIOUSNESS	19	70	86	13	31	57	79	91	66	89	43	65	83	46	67	75	71	43	51	65	51	40	10	40	21	35	62	43	63	32	58	15	85	96	40	24	24	79	85	51	62	28	62	97	59	43	1	90	28
Self-Efficacy	21	46	67	21	26	7	13	96	64	58	41	58	64	73	31	86	34	9	31	26	26	9	21	26	49	21	73	34	24	26	49	31	49	78	13	38	26	64	38	3	89	1	41	77	41	9	1	52	6
Orderliness	36	71	92	10	10	55	80	75	36	92	29	67	87	57	78	16	44	81	47	67	67	16	36	75	16	44	75	60	73	29	75	17	75	81	67	25	23	87	92	75	94	63	87	94	87	44	44	87	62
Dutifulness	44	42	78	72	9	69	78	87	93	75	45	87	93	42	56	87	83	31	56	75	16	72	31	45	58	58	30	31	78	6	31	16	93	83	45	41	62	58	66	75	42	42	61	91	87	19	6	88	26
Achievement-Striving	16	67	66	16	47	55	76	83	26	73	60	35	8	22	43	73	60	37	32	60	60	60	0	1	37	71	83	60	26	60	71	43	60	81	47	4	33	26	84	23	1	21	47	67	47	26	60	56	28
Self-Discipline	23	60	68	23	53	49	77	87	54	68	46	87	91	63	49	93	65	54	60	78	78	65	23	57	23	43	78	65	77	78	54	27	75	91	34	26	42	75	97	57	60	27	57	99	7	75	0	77	14
Cautiousness	26	80	80	18	68	80	80	64	88	87	55	28	82	34	87	73	88	33	71	46	37	50	18	64	18	12	13	18	64	28	42	18	88	93	37	64	13	88	47	55	53	44	37	80	55	75	1	96	58
NEUROTICISM	87	62	52	15	32	15	7	10	0	7	4	13	13	37	28	0	9	43	60	20	2	13	26	11	15	32	2	43	50	49	1	58	47	5	13	17	9	49	16	44	26	56	23	0	49	49	83	2	64
Anxiety	76	42	27	21	56	3	6	22	3	22	3	0	21	46	32	0	7	68	52	14	0	14	14	22	30	58	22	39	45	76	3	61	14	14	30	12	18	58	19	59	8	42	30	0	30	39	99	0	71
Anger	52	53	60	1	45	20	20	9	0	1	1	39	13	73	14	1	27	43	94	23	16	43	7	16	69	19	5	76	60	87	7	84	60	0	23	14	27	13	60	48	36	36	31	1	87	76	39	4	38
Depression	76	84	72	51	68	25	22	10	3	49	10	10	26	6	42	5	7	43	69	16	10	34	26	16	19	34	31	19	72	16	7	77	83	3	10	9	21	60	9	49	51	60	23	6	66	60	58	38	48
Self-Consciousness	89	97	58	38	14	41	22	14	8	30	49	39	14	48	41	22	21	14	32	39	30	3	38	30	0	14	0	48	39	14	14	23	48	14	8	39	21	48	8	39	0	41	14	0	39	38	30	22	75
Immoderation	72	47	38	42	20	19	12	22	24	3	8	50	33	55	28	0	16	42	37	50	3	33	62	22	9	52	3	42	28	40	33	28	33	62	40	38	20	72	38	31	84	91	50	28	22	42	77	0	61
Vulnerability	93	13	48	9	31	41	19	49	24	13	29	13	33	27	52	21	43	62	41	29	13	16	62	21	43	53	13	43	48	59	4	52	43	33	29	58	13	53	19	49	31	52	39	31	39	33	99	28	68
OPENNESS TO EXPERIENCE	24	33	65	26	77	52	48	35	14	10	60	22	29	0	68	60	37	29	71	41	27	77	43	27	84	77	41	49	56	78	14	49	21	55	49	13	75	24	24	30	86	47	27	94	25	21	87	21	56
Imagination	53	7	19	74	29	23	1	1	1	0	0	17	1	1	2	0	7	2	64	10	1	7	2	4	83	64	55	7	28	35	0	23	1	0	10	1	3	7	4	10	74	0	0	43	90	53	95	11	27
Artistic Interests	11	16	60	1	82	80	50	28	11	1	71	38	19	13	53	10	5	19	72	38	28	88	29	28	71	80	10	61	60	61	19	53	29	71	38	8	50	11	14	18	72	72	4	94	61	29	81	60	75
Emotionality	31	29	65	10	66	29	65	71	10	31	58	9	57	8	64	83	81	57	19	19	58	70	57	44	20	91	71	81	54	92	20	64	31	70	71	13	87	57	84	31	64	41	71	84	1	0	83	32	58
Adventurousness	61	42	58	94	62	32	58	44	51	44	74	64	80	19	94	89	51	41	89	64	64	94	80	64	80	51	74	71	48	95	41	63	80	80	82	69	95	71	69	54	98	42	64	99	3	7	3	48	34
Intellect	11	75	79	18	85	75	59	70	47	32	86	15	27	13	66	92	47	47	75	60	51	76	37	15	84	37	41	37	59	78	37	26	37	37	41	4	67	5	10	41	75	75	32	75	86	47	70	10	44
Liberalism	39	67	71	59	77	58	71	69	92	60	69	51	86	25	83	78	78	69	49	69	51	59	78	69	78	78	24	49	71	41	59	67	78	86	60	97	91	69	34	69	49	67	78	67	4	69	99	34	74
Worry about things.	5	2	3	2	4	2	2	3	2	3	1	2	2	3	2	1	3	4	3	3	1	3	2	3	4	4	2	3	3	4	3	4	2	3	3	2	3	4	2	4	5	3	3	1	2	3	5	1	4
Make friends easily.	3	2	4	4	5	4	5	5	5	3	4	4	5	4	4	5	5	5	4	5	4	4	5	4	4	5	4	4	3	4	4	3	4	4	4	3	4	4	4	4	2	4	4	5	4	2	4	4	4
Have a vivid imagination.	4	2	4	3	4	4	3	2	2	4	1	4	2	2	3	4	3	3	4	3	3	4	3	3	4	5	3	3	4	3	4	4	1	3	3	3	3	4	3	3	5	3	2	5	5	4	5	4	4
Trust others.	2	4	3	5	4	4	4	5	4	4	5	4	4	3	4	5	4	4	2	4	5	4	5	4	5	5	5	4	2	4	3	3	5	5	5	4	4	4	4	4	5	3	4	5	2	2	4	4	3
Complete tasks successfully.	4	4	5	4	4	4	4	5	4	5	4	4	4	5	4	5	4	4	4	4	4	4	2	4	4	4	5	4	4	4	4	4	4	5	5	4	4	5	4	4	4	3	5	5	5	3	4	4	4
Get angry easily.	3	2	3	1	3	3	2	2	1	1	1	2	2	4	2	1	2	3	5	2	2	4	2	1	4	3	1	4	3	4	2	5	3	1	2	2	2	2	4	3	5	3	3	1	4	4	2	1	3
Love large parties.	1	1	3	4	4	2	3	4	3	2	3	3	3	3	3	1	4	4	3	5	3	4	4	3	4	5	3	5	2	5	5	2	4	3	3	1	2	4	2	3	3	3	4	5	1	2	1	3	3
Believe in the importance of art.	2	2	5	1	5	5	5	4	3	2	5	4	4	2	4	1	3	3	5	4	4	5	2	5	5	5	2	5	4	5	3	5	4	4	4	4	4	3	1	3	5	4	3	5	5	3	5	4	5
Use others for my own ends.	3	1	3	2	3	1	2	2	4	2	1	3	2	3	2	1	1	2	2	1	1	1	3	2	1	3	1	3	2	1	2	4	1	1	1	3	3	1	1	2	4	3	2	1	1	3	1	2	1
Like to tidy up.	4	2	4	2	2	2	4	4	3	5	3	3	4	5	4	2	2	4	2	4	4	2	4	4	2	4	5	2	2	4	3	2	4	4	3	3	2	5	4	4	3	3	5	5	4	2	5	3	4
Often feel blue.	4	2	3	3	3	2	1	1	1	4	1	2	2	1	2	1	1	3	4	1	1	1	2	1	2	2	1	1	3	2	1	4	4	1	1	1	2	2	1	3	5	3	1	1	4	4	2	2	2
Take charge.	3	4	4	2	4	2	4	2	5	5	2	4	4	4	3	2	3	3	5	3	3	3	4	3	4	4	4	3	3	3	4	3	4	4	3	3	3	4	4	3	4	4	4	5	5	5	3	3	2
Experience my emotions intensely.	3	2	3	2	5	3	3	4	2	3	3	3	3	3	3	4	4	4	4	4	3	5	4	3	4	5	4	5	3	5	3	4	3	3	5	3	4	3	3	3	4	3	4	5	2	3	5	2	4
Love to help others.	4	4	5	4	4	4	3	5	4	4	4	4	4	4	3	5	5	3	3	5	4	5	5	3	4	5	5	3	3	4	3	3	4	5	3	3	5	5	5	4	4	3	3	5	2	5	5	4	4
Keep my promises.	4	5	5	5	4	5	5	5	5	5	5	5	5	4	5	5	5	4	4	4	4	5	4	5	5	5	5	4	5	4	4	4	5	5	5	4	5	4	5	5	4	4	4	5	5	3	5	5	4
Find it difficult to approach others.	4	4	3	3	1	4	1	1	2	3	4	2	2	2	3	1	1	2	3	4	3	1	2	1	1	1	1	1	2	3	3	2	2	1	1	2	3	2	1	2	5	3	1	1	2	4	2	3	4
Am always busy.	3	4	3	4	4	4	2	2	1	4	3	3	4	3	2	5	4	4	2	2	3	3	4	3	3	2	2	2	4	3	2	2	2	4	3	2	2	3	2	3	1	1	3	1	1	4	2	2	3
Prefer variety to routine.	5	4	3	5	5	3	3	3	2	2	5	5	4	3	5	5	3	3	5	4	4	4	5	3	4	3	4	3	3	5	3	4	5	5	5	5	4	4	3	3	4	3	4	5	2	2	3	3	5
Love a good fight.	1	1	2	2	1	3	1	1	1	1	1	1	1	1	2	1	1	1	1	3	1	3	1	1	1	1	1	1	2	1	1	4	1	1	1	3	1	1	1	1	5	3	1	1	1	1	1	1	1
Work hard.	4	4	4	4	4	4	4	5	3	5	4	4	4	4	4	5	5	4	3	5	4	4	2	3	4	5	5	4	4	4	5	4	4	5	3	4	3	4	5	4	1	3	4	4	4	3	4	4	4
Go on binges.	3	1	2	3	1	1	2	3	1	1	2	3	2	4	1	1	4	2	1	4	1	1	4	3	1	2	1	3	2	3	4	1	2	3	3	3	2	4	3	2	4	4	2	3	1	1	1	2	2
Love excitement.	4	2	4	5	4	2	3	4	1	3	4	3	2	4	2	5	4	4	4	3	1	4	5	4	5	4	3	4	4	4	5	4	4	3	3	5	3	5	5	3	5	4	4	5	4	2	5	4	3
Love to read challenging material.	2	4	4	2	3	4	3	3	1	2	4	2	4	1	3	5	3	3	4	4	2	4	2	2	4	3	1	2	4	4	3	3	3	4	2	3	3	2	2	3	5	4	3	3	4	2	2	2	3
Believe that I am better than others.	2	4	4	1	1	1	1	1	4	3	1	1	1	1	1	1	1	2	3	1	1	3	3	1	3	2	1	2	3	2	1	2	2	1	1	2	3	1	3	1	4	3	1	3	4	4	1	3	1
Am always prepared.	2	4	3	2	3	2	3	4	3	4	2	4	4	2	2	4	3	3	4	3	4	2	2	2	3	4	4	3	4	3	3	2	4	4	2	2	2	3	4	4	3	2	3	5	4	5	2	3	3
Panic easily.	5	1	2	1	2	1	1	2	2	1	1	1	1	2	1	1	1	3	2	3	1	1	4	3	2	4	2	3	2	2	1	2	1	1	1	2	1	4	1	3	4	2	2	1	2	3	4	1	2
Radiate joy.	2	4	3	4	3	3	4	4	4	4	3	3	4	5	3	5	4	4	4	4	4	4	4	4	4	5	4	4	3	4	4	3	4	5	4	1	4	3	4	3	1	4	3	5	4	2	3	3	3
Tend to vote for liberal political candidates.	3	4	4	3	4	3	4	4	5	3	3	3	4	1	5	4	4	4	3	5	3	4	4	3	3	4	4	3	3	4	4	4	5	4	5	5	5	4	4	3	4	4	4	4	1	4	4	3	3
Sympathize with the homeless.	2	2	4	5	4	4	5	4	4	4	5	4	4	4	4	5	5	4	4	5	4	5	4	4	5	4	4	4	2	5	5	3	5	5	4	4	5	4	4	5	4	4	4	5	2	4	5	3	3
Jump into things without thinking.	2	1	2	4	2	1	1	1	2	1	2	3	2	4	1	4	1	3	2	2	3	3	4	1	4	5	4	4	2	5	4	4	1	1	3	3	3	1	3	2	4	3	3	1	1	2	5	1	2
Fear for the worst.	4	2	3	3	3	1	1	2	1	2	2	1	1	3	4	1	1	4	4	1	1	1	1	2	4	4	4	4	3	4	2	2	1	1	1	1	1	4	2	3	2	2	2	1	4	3	5	1	3
Feel comfortable around people.	4	2	4	4	4	4	4	5	5	3	4	5	4	5	4	5	5	4	4	5	4	5	5	4	5	5	5	4	3	5	4	4	5	5	4	2	5	5	5	4	2	3	4	5	2	2	4	4	4
Enjoy wild flights of fantasy.	4	2	3	5	3	3	2	1	1	1	1	3	1	2	1	1	1	3	4	2	1	3	1	2	5	4	4	2	3	3	1	3	1	1	1	1	2	3	2	3	5	1	2	3	5	4	5	2	2
Believe that others have good intentions.	4	4	3	4	4	3	3	5	4	2	5	4	4	4	4	5	5	4	2	3	4	5	5	4	5	5	5	3	2	4	3	3	5	5	4	4	4	4	5	4	5	4	4	4	4	2	3	3	3
Excel in what I do.	3	4	3	3	3	2	2	5	3	4	3	3	3	4	3	4	3	2	3	4	3	1	4	4	4	2	4	3	3	3	4	3	3	4	3	3	3	3	3	2	4	3	3	3	4	3	2	3	3
Get irritated easily.	4	4	4	2	3	2	2	2	1	1	1	1	2	4	2	1	2	3	5	2	2	2	2	2	3	2	1	4	4	4	2	4	4	1	2	2	3	2	4	3	4	2	2	1	4	4	4	2	3
Talk to a lot of different people at parties.	1	1	3	4	3	4	3	3	2	2	3	3	3	3	3	2	4	3	3	5	4	4	4	3	5	5	4	5	4	3	4	3	4	3	1	2	4	2	4	2	3	2	4	5	3	2	1	2	2
See beauty in things that others might not notice.	3	3	3	3	4	4	3	4	2	3	4	3	3	4	3	4	4	3	4	3	3	5	4	3	5	5	4	3	4	3	3	3	3	4	3	3	4	3	4	3	5	3	3	5	5	3	4	4	4
Cheat to get ahead.	1	1	2	1	1	1	1	1	1	1	1	3	1	1	1	1	1	2	2	1	1	1	2	1	1	2	1	2	1	1	1	1	1	1	1	2	1	1	1	1	5	2	1	1	1	1	4	1	1
Often forget to put things back in their proper place.	3	1	2	5	4	2	2	3	2	1	3	2	2	3	2	5	2	2	3	2	4	4	4	3	4	4	2	2	1	4	3	3	2	1	3	4	3	2	2	2	1	3	2	1	1	3	4	1	2
Dislike myself.	3	4	3	2	2	1	2	1	1	1	1	1	1	1	2	1	1	2	3	2	1	3	2	1	1	3	3	3	3	1	1	2	3	1	1	1	1	4	1	2	1	3	3	1	2	3	1	3	1
Try to lead others.	3	4	4	2	3	1	4	2	4	5	1	4	4	1	3	1	4	2	4	3	2	2	4	2	4	4	4	3	2	3	3	3	3	3	3	3	3	1	5	3	2	4	4	4	4	5	1	2	2
Feel others' emotions.	4	4	4	4	4	3	3	4	3	4	4	3	4	3	4	5	5	4	3	2	4	4	4	3	3	5	4	4	4	5	4	4	4	5	4	3	5	4	5	4	3	4	4	3	4	2	5	4	4
Am concerned about others.	5	4	5	4	4	4	2	4	2	3	4	3	5	3	3	5	3	3	3	3	4	5	4	3	5	4	5	4	4	5	3	4	4	4	3	3	4	3	3	4	3	3	4	1	2	4	5	3	3
Tell the truth.	5	4	4	4	4	4	4	5	5	4	4	5	5	4	3	5	4	4	5	5	4	5	3	4	4	4	5	4	4	3	4	4	5	4	5	4	5	4	5	4	4	4	4	5	5	3	3	5	4
Am afraid to draw attention to myself.	5	5	3	3	3	1	2	2	1	2	3	3	2	3	2	5	3	2	2	3	4	3	2	3	1	3	2	2	2	2	1	3	4	2	3	2	3	4	2	3	4	3	2	1	1	1	5	3	3
Am always on the go.	3	4	3	4	3	2	3	5	1	4	3	4	2	4	3	1	4	4	3	4	4	4	3	4	4	2	2	3	4	3	3	2	1	4	3	2	3	3	3	4	1	2	3	5	1	4	2	2	4
Prefer to stick with things that I know.	3	4	3	2	4	2	2	3	2	3	3	4	2	4	2	4	3	3	2	3	3	2	2	2	2	3	2	2	3	1	4	2	4	3	3	4	2	2	2	4	4	3	3	1	4	4	5	4	4
Yell at people.	1	1	1	1	1	1	1	1	1	1	1	1	2	2	1	1	1	2	3	1	1	1	1	1	3	2	1	2	3	3	1	2	4	1	1	1	1	1	1	2	1	1	1	1	2	4	2	1	1
Do more than what's expected of me.	2	4	4	2	4	3	4	5	3	4	4	3	3	3	3	4	4	3	4	3	4	4	1	2	3	4	5	4	3	4	4	4	4	5	4	2	5	4	4	3	1	4	4	4	4	3	4	4	3
Rarely overindulge.	2	2	3	3	4	3	5	4	1	4	3	3	1	3	4	5	5	2	3	3	4	4	3	4	4	2	5	3	3	4	4	4	3	1	4	3	5	1	4	4	1	1	3	3	4	2	1	5	1
Seek adventure.	4	1	4	5	3	3	3	3	1	2	3	3	3	1	2	1	3	4	3	3	1	4	5	3	4	3	3	4	3	4	3	3	2	3	4	5	1	4	5	2	2	2	3	4	2	3	5	5	3
Avoid philosophical discussions.	3	1	1	2	1	2	2	2	2	3	1	3	2	1	2	1	2	2	2	2	2	1	2	4	1	3	2	2	2	2	3	4	5	2	2	4	2	4	2	2	5	2	3	1	1	1	1	2	2
Think highly of myself.	2	2	4	3	3	1	4	3	4	3	3	3	4	1	3	5	3	3	3	1	2	3	2	1	3	3	3	3	3	3	3	3	2	3	3	2	4	1	2	3	1	3	1	5	4	4	4	3	2
Carry out my plans.	3	4	5	4	4	4	4	4	3	5	4	4	4	3	4	5	4	4	4	4	3	4	3	4	3	3	5	4	4	4	4	4	5	5	4	4	4	5	5	3	4	3	4	5	4	4	4	5	3
Become overwhelmed by events.	4	1	2	1	2	3	2	4	2	3	2	3	3	2	2	4	3	4	2	2	3	3	3	2	3	4	2	4	3	5	2	3	1	4	2	2	2	3	3	2	5	2	3	4	1	2	4	3	3
Have a lot of fun.	3	2	3	4	3	4	3	5	3	4	4	4	4	4	4	4	4	4	3	4	3	4	4	3	4	4	4	4	3	5	4	2	4	5	5	3	4	4	3	3	3	3	3	5	2	4	2	4	3
Believe that there is no absolute right or wrong.	3	5	1	5	4	5	4	5	3	4	5	4	5	5	4	4	4	3	1	3	4	4	2	5	3	4	2	4	4	3	4	3	4	5	4	5	4	5	2	5	5	4	5	1	2	2	5	3	4
Feel sympathy for those who are worse off than myself.	4	2	4	5	4	4	4	4	4	4	4	5	5	4	4	5	5	4	4	5	4	5	4	4	4	5	5	4	3	5	5	4	5	5	5	5	5	5	4	5	3	4	4	5	2	4	5	3	4
Make rash decisions.	4	2	2	4	3	2	2	3	1	1	3	3	2	4	2	1	2	4	2	2	3	2	4	1	3	4	4	4	2	2	3	3	2	1	3	2	4	2	2	2	2	3	3	1	4	2	4	1	2
Am afraid of many things.	3	2	1	2	2	1	1	1	3	1	1	1	5	2	1	1	1	3	1	1	1	2	2	1	1	4	1	3	2	3	1	2	2	1	1	2	2	2	1	3	2	2	2	1	2	4	5	1	2
Avoid contacts with others.	4	4	2	2	1	1	1	1	1	3	1	1	2	2	2	1	1	1	2	1	1	1	2	1	1	1	1	1	2	1	1	2	1	1	1	3	1	2	1	2	1	1	1	1	4	4	4	1	2
Love to daydream.	4	4	3	5	2	2	3	2	1	1	3	1	1	4	2	1	3	2	4	3	1	1	3	2	5	4	5	3	4	3	3	3	1	3	3	1	1	3	4	2	1	3	1	5	5	4	5	3	4
Trust what people say.	4	4	3	4	4	3	4	4	4	3	4	4	4	3	3	5	4	4	2	3	4	5	5	4	5	4	5	4	2	4	3	3	5	5	5	4	3	4	4	4	5	3	4	4	4	5	3	4	3
Handle tasks smoothly.	4	4	4	4	4	4	4	5	5	4	5	5	5	5	4	5	4	3	4	4	4	4	4	4	4	4	5	4	4	4	4	4	5	5	4	4	4	5	4	4	4	3	4	5	3	4	2	5	3
Lose my temper.	2	2	3	1	2	1	1	1	1	1	1	2	2	4	1	1	2	3	4	2	1	4	1	2	4	2	1	4	3	4	1	4	4	1	2	1	1	2	3	2	5	2	2	1	4	4	2	1	2
Prefer to be alone.	3	4	2	3	3	1	3	2	1	2	3	1	4	1	2	4	1	3	3	1	1	2	3	1	2	2	3	4	3	2	2	2	2	2	2	4	1	2	2	3	2	3	3	3	5	4	4	4	4
Do not like poetry.	3	2	2	5	1	1	4	3	2	4	2	3	4	1	2	1	4	2	2	3	4	1	2	3	2	2	2	2	2	2	2	3	4	1	2	5	3	4	4	3	3	1	3	1	2	2	1	1	2
Take advantage of others.	3	1	2	1	1	1	1	1	2	1	1	1	1	1	1	1	1	2	1	1	1	1	2	1	1	1	1	3	1	1	1	2	1	1	1	3	2	1	1	1	3	2	1	1	1	2	1	1	1
Leave a mess in my room.	4	2	1	4	4	2	2	1	4	1	4	2	1	3	2	2	3	1	2	2	1	4	3	1	4	4	2	2	2	4	1	4	2	2	1	4	3	1	1	1	2	2	1	1	1	1	2	2	2
Am often down in the dumps.	4	4	4	4	3	1	2	1	1	3	1	1	4	2	3	1	1	3	3	1	1	2	2	2	2	1	2	1	4	2	1	4	4	1	1	1	2	2	1	3	1	3	1	1	4	2	4	2	3
Take control of things.	3	4	4	2	4	3	4	4	5	5	3	4	5	2	4	5	4	4	4	3	4	3	4	4	4	3	5	4	4	4	5	4	4	4	3	4	1	4	4	3	3	2	4	5	5	4	4	4	3
Rarely notice my emotional reactions.	2	1	2	4	2	2	1	1	2	1	1	3	1	3	2	1	1	2	4	3	1	1	2	1	3	1	1	1	2	1	4	2	2	1	2	4	1	1	1	2	4	3	1	1	4	3	2	3	2
Am indifferent to the feelings of others.	3	1	1	2	1	2	2	1	1	1	1	2	1	3	1	1	1	2	2	1	1	1	1	1	1	4	1	1	2	1	1	2	1	1	1	2	1	2	1	1	2	2	1	1	2	2	2	2	2
Break rules.	3	4	2	2	2	2	1	1	1	1	3	1	1	3	2	1	1	3	2	1	1	3	2	2	3	3	5	3	2	4	3	4	1	1	4	4	2	2	4	1	2	3	1	1	1	1	4	2	2
Only feel comfortable with friends.	3	4	4	2	2	3	2	2	1	3	2	2	2	5	2	1	1	2	3	1	1	1	5	2	1	1	1	5	4	2	2	2	2	2	2	4	2	2	2	3	4	2	3	1	4	2	1	2	3
Do a lot in my spare time.	2	4	4	4	4	4	3	5	1	3	3	4	3	5	3	5	4	3	2	4	4	4	4	4	4	3	4	4	3	3	3	2	3	4	5	4	4	3	3	4	2	3	3	5	1	4	2	5	3
Dislike changes.	3	4	3	1	2	4	2	3	3	2	2	2	2	3	1	1	2	3	2	2	2	1	2	2	2	3	2	2	3	1	2	3	1	1	2	2	1	2	1	2	5	3	2	1	4	5	5	1	4
Insult people.	2	2	2	1	1	1	1	1	1	1	1	1	1	1	1	1	1	2	2	1	1	1	2	1	3	1	1	5	2	1	1	2	1	1	1	2	1	1	1	1	1	2	1	1	2	4	1	1	1
Do just enough work to get by.	3	1	1	2	2	1	1	1	2	1	1	2	2	2	1	1	2	2	2	1	1	2	3	2	2	2	1	2	3	1	1	2	2	2	1	4	2	2	1	2	1	3	1	1	1	2	1	2	3
Easily resist temptations.	2	4	3	2	4	4	3	3	4	4	5	3	4	2	1	5	4	3	3	3	4	2	2	4	3	2	4	2	3	2	3	3	2	4	2	3	4	2	4	3	2	3	2	4	2	3	1	5	4
Enjoy being reckless.	3	2	2	4	2	2	1	4	1	1	4	3	1	4	1	1	2	4	2	3	2	4	3	4	4	3	1	3	2	3	1	3	2	1	1	4	2	3	2	2	2	3	4	3	1	2	4	4	2
Have difficulty understanding abstract ideas.	3	2	1	3	1	1	1	1	1	1	1	3	4	3	1	1	2	2	1	1	1	1	2	2	1	1	1	2	1	1	1	2	1	2	2	4	2	2	2	3	5	1	1	1	1	2	1	3	3
Have a high opinion of myself.	2	2	3	4	3	2	3	4	5	4	5	4	4	3	3	5	4	3	3	4	3	4	3	4	4	3	3	4	4	4	4	3	2	5	5	2	5	1	3	3	1	3	3	5	2	4	2	3	2
Waste my time.	4	4	3	3	2	1	2	1	1	2	1	1	1	1	2	1	2	3	3	1	1	2	3	2	3	3	3	2	2	1	2	4	1	1	1	3	2	2	1	2	4	3	3	1	5	3	5	2	2
Feel that I'm unable to deal with things.	4	2	3	2	2	2	1	1	2	1	3	1	1	2	2	1	2	2	2	1	1	1	1	1	3	2	1	1	2	1	1	2	4	1	1	3	1	1	1	2	3	2	2	1	4	2	5	1	2
Love life.	3	2	3	3	4	5	5	5	5	4	5	5	5	5	4	5	4	4	4	5	5	5	5	4	5	5	4	4	3	5	5	2	4	5	5	5	5	5	4	4	2	3	4	5	3	2	5	5	4
Tend to vote for conservative political candidates.	3	4	1	3	3	5	2	2	1	2	3	3	1	3	1	1	2	2	3	2	3	3	2	3	1	2	5	3	2	3	3	3	2	2	4	1	2	3	3	3	5	3	2	3	5	2	1	3	3
Am not interested in other people's problems.	2	2	2	1	2	2	2	1	1	2	1	2	1	3	2	1	1	2	2	1	1	2	1	1	2	1	1	2	2	1	2	3	1	1	1	3	1	2	2	2	3	2	2	1	4	2	1	2	4
Rush into things.	4	2	2	4	1	2	2	3	2	2	3	4	2	3	1	1	2	3	2	3	3	3	3	3	4	4	4	3	3	4	3	2	2	2	1	2	4	2	2	3	3	3	3	3	2	2	5	1	2
Get stressed out easily.	4	4	2	3	3	1	2	3	1	3	2	1	2	5	2	1	3	4	3	3	2	3	4	3	2	2	2	2	3	4	1	4	4	4	5	2	2	4	3	3	3	3	3	1	2	2	5	1	3
Keep others at a distance.	4	4	3	4	2	2	3	1	2	3	2	3	3	1	1	1	1	2	4	1	1	3	2	2	2	2	1	2	3	1	3	4	1	1	1	3	2	2	1	3	1	4	2	1	4	4	4	3	3
Like to get lost in thought.	4	2	3	5	2	3	2	1	1	1	2	3	2	2	3	1	4	2	4	2	1	3	3	2	5	4	3	3	3	4	1	2	1	1	3	2	1	1	2	2	2	1	2	1	4	4	5	3	2
Distrust people.	4	2	3	2	1	2	2	1	2	3	1	1	2	3	2	1	1	2	4	1	1	1	2	1	1	2	1	2	2	1	4	3	1	1	1	2	2	1	4	2	2	3	1	1	4	4	3	3	3
Know how to get things done.	3	4	5	3	4	3	3	5	5	4	4	5	5	3	4	5	4	4	4	3	4	4	4	3	4	4	4	4	3	4	4	4	4	4	2	4	4	4	4	3	2	3	4	5	4	3	3	4	3
Am not easily annoyed.	2	2	3	5	4	4	3	5	5	5	5	1	4	2	4	5	2	3	2	4	4	4	4	4	2	4	4	2	3	2	4	3	3	5	4	4	4	4	4	3	5	3	4	5	2	2	4	5	4
Avoid crowds.	4	4	2	2	3	3	1	1	2	2	1	1	1	2	1	2	1	1	3	1	1	1	2	1	1	1	1	1	2	1	1	2	1	1	1	3	1	1	1	2	4	1	3	1	5	3	2	4	2
Do not enjoy going to art museums.	2	4	2	5	1	2	1	3	3	3	1	1	2	5	2	4	4	3	2	1	1	1	2	3	2	1	4	1	2	1	3	2	1	1	2	4	1	2	2	2	1	1	4	1	3	2	1	3	2
Obstruct others' plans.	1	1	2	1	1	1	1	1	1	1	1	1	1	1	1	1	1	2	1	1	1	1	2	1	1	1	1	1	2	1	1	2	1	1	1	2	1	1	1	1	1	2	2	1	2	2	1	1	1
Leave my belongings around.	4	1	1	4	2	2	2	1	4	1	3	1	1	5	1	4	3	2	2	2	1	4	4	1	4	2	2	2	2	3	1	4	2	2	1	4	2	2	1	2	1	1	1	1	1	4	4	1	2
Feel comfortable with myself.	3	2	3	4	3	3	4	4	5	4	4	5	5	5	4	5	4	4	4	4	4	3	4	4	4	3	4	4	3	5	4	3	2	5	4	4	5	2	4	4	1	4	4	5	4	3	2	4	4
Wait for others to lead the way.	4	1	2	4	2	2	1	1	1	1	3	1	2	1	2	4	3	3	2	3	3	2	3	3	1	2	4	2	3	3	2	3	3	1	1	3	2	1	1	3	5	3	2	1	2	2	4	2	3
Don't understand people who get emotional.	2	4	1	1	2	3	1	1	2	3	1	2	1	3	1	1	1	1	3	1	1	2	1	1	2	1	1	1	2	1	1	2	2	1	1	3	1	1	1	2	1	2	1	1	5	3	1	2	3
Take no time for others.	2	2	1	2	2	2	2	1	1	2	1	4	1	1	1	1	1	2	2	1	1	1	1	2	2	1	1	1	2	1	1	2	1	1	2	2	1	4	1	2	1	1	1	5	4	2	1	1	2
Break my promises.	2	1	1	1	2	1	2	1	1	1	1	1	1	2	1	1	1	2	2	1	4	1	2	2	1	1	1	2	1	1	2	2	1	1	1	1	1	1	1	1	2	1	1	1	1	3	2	1	2
Am not bothered by difficult social situations.	1	1	3	3	4	3	2	3	3	4	3	2	4	4	2	4	2	4	4	3	4	5	4	2	5	3	5	2	3	2	4	4	2	3	5	3	5	2	4	3	1	3	4	5	2	2	4	5	2
Like to take it easy.	4	2	3	4	4	4	3	2	4	4	3	3	4	4	4	5	4	4	4	3	4	4	4	4	3	4	4	4	3	2	4	4	5	4	4	4	4	4	5	2	5	3	4	5	4	3	5	5	4
Am attached to conventional ways.	3	2	1	2	4	4	3	3	2	3	3	3	2	4	2	1	3	3	2	3	3	1	3	3	2	2	3	2	2	3	3	3	2	3	2	2	2	3	3	2	5	3	3	1	5	3	4	3	4
Get back at others.	3	1	2	1	2	2	1	1	1	1	1	1	1	2	1	1	1	2	2	1	1	1	2	1	2	1	4	1	2	1	2	3	1	1	1	2	1	1	1	1	2	2	1	1	1	2	2	1	1
Put little time and effort into my work.	2	1	2	3	1	1	1	1	2	1	1	1	5	5	2	1	2	2	2	1	1	1	2	5	2	1	1	1	3	1	2	2	1	1	1	4	2	4	1	2	1	2	2	1	2	2	1	2	1
Am able to control my cravings.	2	2	3	4	4	4	4	5	4	5	5	3	4	4	5	5	4	3	3	4	5	2	3	4	4	3	4	4	4	4	4	3	4	2	4	4	4	4	2	3	4	2	3	5	4	2	2	5	4
Act wild and crazy.	1	1	1	2	1	1	1	1	1	1	1	3	2	3	1	1	2	3	1	1	1	2	2	1	4	2	1	2	2	1	1	3	1	1	1	3	1	1	1	1	4	1	1	1	1	2	1	1	1
Am not interested in theoretical discussions.	3	1	1	3	1	1	1	1	1	3	1	3	3	4	1	1	2	2	1	3	2	2	2	3	1	3	2	2	2	1	3	2	1	4	2	2	1	4	4	2	3	1	4	1	1	2	1	3	2
Boast about my virtues.	1	1	3	1	1	1	2	1	1	1	1	3	2	1	1	1	3	3	2	1	1	1	1	1	3	2	3	4	1	1	2	2	1	1	1	3	3	2	1	2	2	5	1	1	4	4	1	2	1
Have difficulty starting tasks.	2	1	2	4	2	3	1	1	3	3	3	1	1	2	2	1	2	2	2	1	1	1	3	1	4	3	1	2	2	1	3	2	4	2	4	4	2	2	1	2	2	2	1	1	5	2	5	2	4
Remain calm under pressure.	3	5	4	4	4	4	4	3	4	5	4	5	2	3	2	5	2	3	4	4	5	4	2	5	4	5	5	4	4	3	5	4	2	3	2	3	4	3	5	3	3	3	4	5	4	4	1	4	3
Look at the bright side of life.	2	4	3	4	4	4	4	5	4	4	5	5	5	4	5	5	4	3	3	5	4	4	5	5	4	5	4	4	3	5	5	3	4	5	5	4	5	4	5	3	5	3	4	5	4	2	2	5	4
Believe that we should be tough on crime.	4	4	2	4	3	3	4	5	2	4	3	4	4	5	5	4	3	3	2	4	4	4	1	3	2	3	4	4	3	5	4	3	4	3	4	3	3	4	5	3	5	4	4	1	4	2	1	5	3
Try not to think about the needy.	4	4	1	2	2	2	2	1	1	3	2	2	1	3	1	1	2	2	2	1	1	1	1	3	3	2	3	1	2	1	2	3	2	1	2	3	1	3	1	2	2	1	1	1	4	1	4	3	2
Act without thinking.	4	1	1	3	1	1	2	1	1	1	1	2	1	3	1	1	1	3	1	3	2	3	4	3	4	3	2	4	2	1	2	4	1	1	4	2	2	1	4	2	2	1	2	1	2	2	5	1	2
[truncated: 154 more columns]
